# Supplementary material for: Changing Patterns of Human Campylobacteriosis, England and Wales, 1990–2007
Source: PubMed Central journal article supplement (PMC3044522; doi:10.3201/eid1512.090280), 2009-12
Supplement: 09-0280_appT-s1.pdf [file 09-0280_appT-s1.pdf]

Appendix Table. Relative incidence of *Campylobacter* infection in each year compared with that in 1990 among patients  $\geq 60$  years of age infected with selected gastrointestinal pathogens, England and Wales, 1991–2007

| Year | Relative risk (95% confidence interval) |               |               |               |               |               |               |               |               |               | Nontyphoidal salmonellae† | Cryptosporidiosis‡ |
|------|-----------------------------------------|---------------|---------------|---------------|---------------|---------------|---------------|---------------|---------------|---------------|---------------------------|--------------------|
|      | <i>Campylobacter</i> spp.               |               |               |               |               |               |               |               |               |               |                           |                    |
|      | Sex                                     |               | Area*         |               |               | Season        |               |               |               |               |                           |                    |
| Male | Female                                  | Northern      | Mid-country   | Southern      | Spring        | Summer        | Fall          | Winter        |               |               |                           |                    |
| 1991 | 1.1 (1.1–1.2)                           | 1.0 (1.0–1.1) | 1.1 (1.0–1.2) | 1.1 (1.0–1.1) | 1.1 (1.0–1.1) | 1.0 (0.9–1.1) | 1.2 (1.1–1.3) | 1.0 (0.9–1.1) | 0.9 (0.8–1.0) | 0.9 (0.9–1.0) | 1.0 (0.8–1.3)             |                    |
| 1992 | 1.3 (1.3–1.4)                           | 1.2 (1.2–1.3) | 1.3 (1.2–1.4) | 1.4 (1.3–1.5) | 1.2 (1.1–1.3) | 1.2 (1.1–1.3) | 1.4 (1.3–1.6) | 1.2 (1.1–1.3) | 1.1 (1.0–1.3) | 1.2 (1.1–1.2) | 1.3 (1.0–1.5)             |                    |
| 1993 | 1.4 (1.3–1.5)                           | 1.3 (1.3–1.4) | 1.3 (1.2–1.4) | 1.4 (1.3–1.6) | 1.4 (1.3–1.5) | 1.3 (1.2–1.5) | 1.6 (1.5–1.7) | 1.2 (1.1–1.3) | 1.3 (1.1–1.4) | 1.1 (1.1–1.2) | 0.8 (0.6–1.0)             |                    |
| 1994 | 1.8 (1.7–1.9)                           | 1.6 (1.5–1.7) | 1.7 (1.6–1.9) | 1.8 (1.6–1.9) | 1.6 (1.5–1.7) | 1.7 (1.6–1.9) | 1.7 (1.6–1.8) | 1.6 (1.5–1.8) | 1.7 (1.5–1.8) | 1.1 (1.1–1.2) | 0.8 (0.6–1.0)             |                    |
| 1995 | 1.7 (1.6–1.8)                           | 1.6 (1.5–1.7) | 1.7 (1.6–1.9) | 1.6 (1.5–1.8) | 1.6 (1.5–1.7) | 1.7 (1.6–1.9) | 1.5 (1.4–1.6) | 1.6 (1.5–1.7) | 1.9 (1.7–2.1) | 1.2 (1.1–1.2) | 1.1 (0.9–1.4)             |                    |
| 1996 | 1.8 (1.7–1.9)                           | 1.8 (1.7–1.9) | 1.6 (1.5–1.7) | 2.0 (1.8–2.1) | 1.8 (1.7–1.9) | 1.8 (1.7–2.0) | 1.6 (1.5–1.8) | 1.7 (1.6–1.8) | 2.2 (2.0–2.4) | 1.3 (1.2–1.3) | 0.7 (0.6–0.9)             |                    |
| 1997 | 2.1 (2.0–2.3)                           | 2.0 (1.9–2.1) | 2.1 (1.9–2.3) | 2.3 (2.1–2.5) | 1.9 (1.8–2.0) | 2.2 (2.0–2.4) | 2.1 (1.9–2.2) | 2.0 (1.8–2.1) | 2.2 (2.0–2.4) | 1.4 (1.4–1.5) | 0.8 (0.6–1.0)             |                    |
| 1998 | 2.6 (2.4–2.7)                           | 2.4 (2.3–2.5) | 2.6 (2.4–2.8) | 2.8 (2.6–3.0) | 2.2 (2.1–2.4) | 2.5 (2.3–2.7) | 2.4 (2.2–2.5) | 2.6 (2.4–2.8) | 2.5 (2.3–2.8) | 1.1 (1.0–1.2) | 0.6 (0.5–0.8)             |                    |
| 1999 | 2.6 (2.4–2.7)                           | 2.4 (2.3–2.5) | 2.5 (2.3–2.7) | 2.7 (2.5–2.9) | 2.4 (2.2–2.5) | 2.8 (2.6–3.1) | 2.5 (2.4–2.7) | 2.3 (2.2–2.5) | 2.3 (2.1–2.6) | 0.8 (0.7–0.8) | 0.7 (0.6–0.9)             |                    |
| 2000 | 2.8 (2.6–2.9)                           | 2.7 (2.5–2.8) | 2.5 (2.3–2.7) | 3.1 (2.9–3.3) | 2.5 (2.4–2.7) | 2.8 (2.6–3.1) | 2.6 (2.4–2.7) | 2.8 (2.6–3.0) | 2.8 (2.5–3.0) | 0.6 (0.6–0.7) | 1.1 (0.9–1.3)             |                    |
| 2001 | 2.6 (2.5–2.8)                           | 2.6 (2.5–2.8) | 2.2 (2.1–2.4) | 3.0 (2.8–3.2) | 2.5 (2.4–2.7) | 2.8 (2.5–3.0) | 2.3 (2.2–2.5) | 2.7 (2.5–2.9) | 2.8 (2.6–3.1) | 0.7 (0.7–0.7) | 0.6 (0.5–0.8)             |                    |
| 2002 | 2.5 (2.4–2.7)                           | 2.4 (2.3–2.5) | 2.1 (1.9–2.2) | 2.8 (2.6–3.0) | 2.4 (2.3–2.6) | 2.8 (2.6–3.0) | 2.4 (2.2–2.6) | 2.3 (2.2–2.5) | 2.4 (2.2–2.7) | 0.7 (0.7–0.7) | 0.8 (0.7–1.0)             |                    |
| 2003 | 2.5 (2.3–2.6)                           | 2.3 (2.2–2.5) | 2.2 (2.0–2.3) | 2.5 (2.4–2.7) | 2.4 (2.3–2.6) | 2.4 (2.2–2.6) | 2.4 (2.3–2.6) | 2.2 (2.1–2.4) | 2.6 (2.3–2.8) | 0.7 (0.6–0.7) | 1.1 (0.9–1.4)             |                    |
| 2004 | 2.6 (2.4–2.7)                           | 2.3 (2.1–2.4) | 2.4 (2.2–2.5) | 2.7 (2.5–2.8) | 2.2 (2.1–2.4) | 2.6 (2.4–2.8) | 2.2 (2.1–2.4) | 2.5 (2.3–2.7) | 2.4 (2.2–2.7) | 0.6 (0.5–0.6) | 0.7 (0.6–0.9)             |                    |
| 2005 | 2.7 (2.6–2.9)                           | 2.4 (2.2–2.5) | 2.6 (2.4–2.8) | 2.7 (2.5–2.9) | 2.4 (2.2–2.5) | 2.4 (2.2–2.6) | 2.6 (2.4–2.7) | 2.7 (2.5–2.9) | 2.5 (2.3–2.7) | 0.6 (0.5–0.6) | 0.9 (0.7–1.1)             |                    |
| 2006 | 2.9 (2.7–3.0)                           | 2.5 (2.4–2.7) | 2.7 (2.5–3.0) | 2.8 (2.7–3.0) | 2.5 (2.4–2.7) | 2.4 (2.2–2.6) | 2.7 (2.5–2.9) | 2.9 (2.7–3.2) | 2.7 (2.5–2.9) | 0.6 (0.6–0.6) | 0.8 (0.7–1.0)             |                    |
| 2007 | 3.6 (3.4–3.9)                           | 3.1 (3.0–3.3) | 3.1 (2.9–3.3) | 3.8 (3.6–4.1) | 3.2 (3.0–3.4) | 3.1 (2.9–3.4) | 3.5 (3.3–3.8) | 3.6 (3.3–3.9) | 3.1 (2.8–3.4) | 0.6 (0.6–0.7) | 0.7 (0.6–0.9)             |                    |

\*Northern, northwest and northeast England as well as Yorkshire and the Humber regions; mid-country, Wales, West Midlands, East Midlands, and East of England regions; southern, London as well as southeast, and southwest regions.

†Age data available for 356,270/380,915 cases (94%).

‡Age data available for 76,462/79,808 cases (96%).
